# Supplementary material for: Three-dimensional inkjet-printed redox cycling sensor
Source: Royal Society of Chemistry journal article supplement (doi:10.1039/c6ra27170g), 2017-01-01
Supplement: c6ra27170g1.pdf [file c6ra27170g1.pdf]

## Electronic Supplementary Information (ESI)

### Three-Dimensional Inkjet-Printed Redox Cycling Sensor

N. Y. Adly,<sup>a</sup> B. Bachmann,<sup>b</sup> K. J. Krause,<sup>a</sup> A. Offenhäusser,<sup>a</sup> B. Wolfrum<sup>a, b</sup> and A. Yakushenko<sup>a†</sup>

a) Institute of Bioelectronics (PGI-8/ICS-8) and JARA—Fundamentals of Future Information Technology, Forschungszentrum Jülich, 52425 Jülich, Germany

b) Neuroelectronics, MSB, Department of Electrical and Computer Engineering, Technical University of Munich (TUM) & BCCN Munich, Boltzmannstrasse 11, Garching, 85748 Germany

**Table S1.** Cost Calculation for a single printed chip of 40 electrodes.

| Material   | Cost (€)         | Cost per chip (Cent) |
|------------|------------------|----------------------|
| Substrate  | 2.5 per A6 sheet | 2.1                  |
| Silver ink | 14 per 1 mL      | 0.37                 |
| Carbon ink | 10 per 1 mL      | 0.26                 |
| PI ink     | 30 per 1 mL      | 0.8                  |
| Total      |                  | 3.6                  |

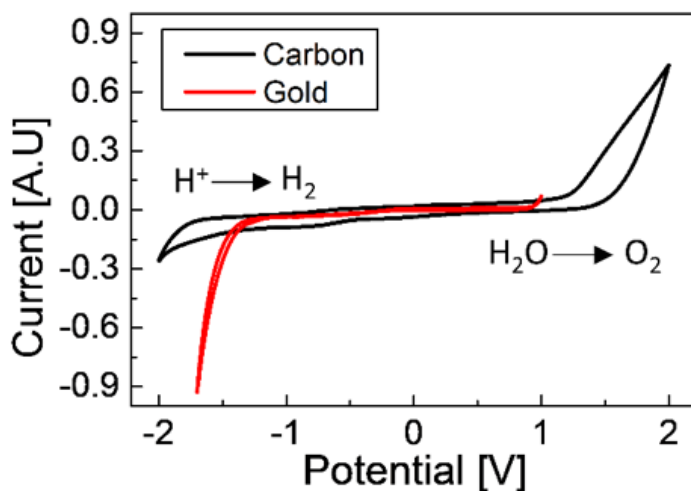

**Fig. S1.** Normalized current values for CV measurements of printed carbon (black line) and gold electrodes (red line) in 0.1 M PBS.

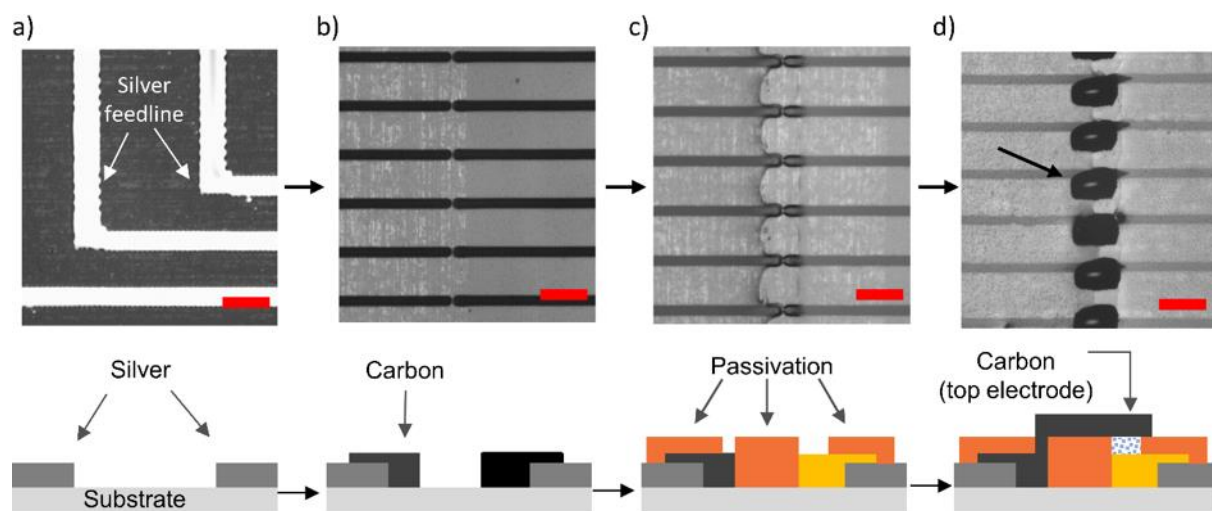

**Fig. S2.** . Fabrication sequence of the printed redox cycling sensors, scale bars represent 200  $\mu\text{m}$ .

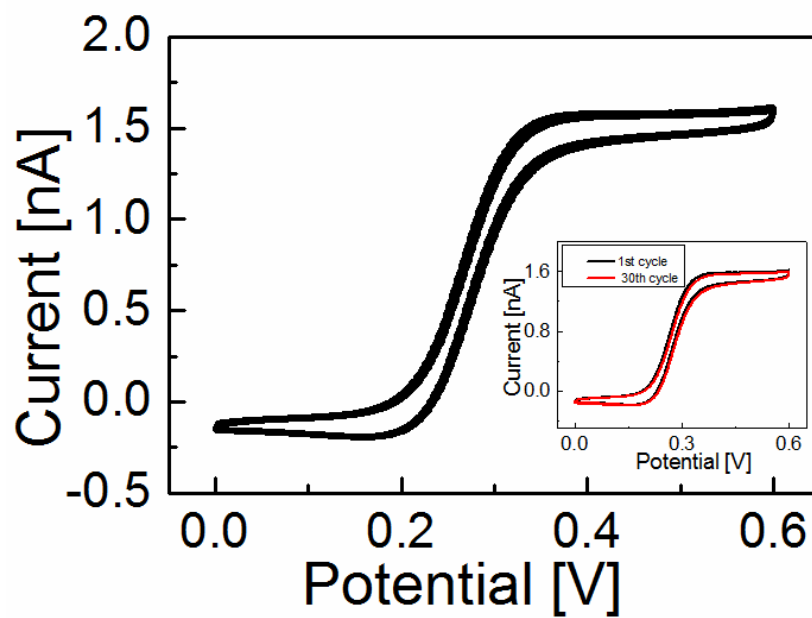

**Fig. S3.** Overlay of CV plots showing cycling stability of printed redox cycling sensors over 30 cycle. Inset showing the first cycle (black curve) as compared to the 30<sup>th</sup> cycle (red curve).

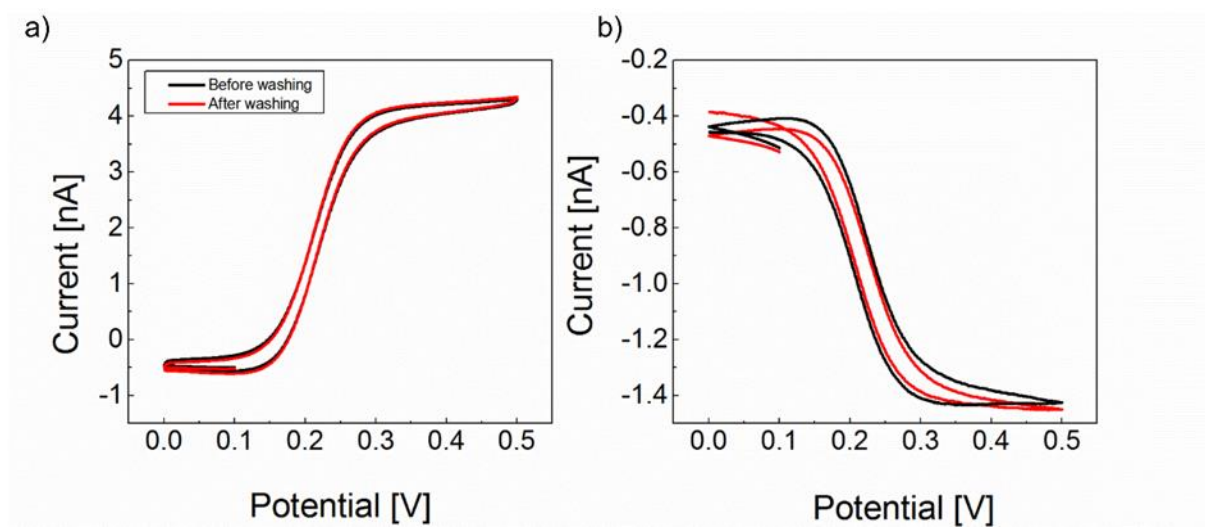

**Fig. S4.** Electrochemical performance of printed redox cycling sensor before washing (black) and after vigorous washing in PBS (red) using 500  $\mu\text{M}$  FeMe(OH)<sub>2</sub> on a) top electrode while b) bottom electrode.
